# Supplementary material for: Agrobacterium rhizogenes—mediated transformation ofPisum sativumL. roots as a tool for studying the mycorrhizal and root nodule symbioses
Source: PeerJ journal article supplement (doi:10.7717/peerj.6552), 2019-03-06
Supplement: Supplementary_materials.pdf [file Supplementary_materials.pdf]

## Raw data

**Table 1. *Agrobacterium rhizogenes*-mediated transformation of *Pisum sativum* cv. Frisson**

|                                        | <b>Total amount of plants</b> | <b>Number of transformed composite plants*</b> | <b>Total number of hairy roots</b> | <b>Number of hairy roots per transformed composite plant</b> |
|----------------------------------------|-------------------------------|------------------------------------------------|------------------------------------|--------------------------------------------------------------|
| <i>Agrobacterium rhizogenes</i> Arqua1 | 114 (10) **                   | 80 (10)**                                      | 130                                | 1,6                                                          |
| <i>Agrobacterium rhizogenes</i> AR1193 | 62 (5)**                      | 50 (5)                                         | 88                                 | 1,8                                                          |

\*Transformed composite plants that gave rise to at least one hairy root per plant.

\*\*The number of independent experiments is indicated within brackets
