# Supplementary material for: Agrobacterium rhizogenes—mediated transformation ofPisum sativumL. roots as a tool for studying the mycorrhizal and root nodule symbioses
Source: PeerJ journal article supplement (doi:10.7717/peerj.6552), 2019-03-06
Supplement: Table_S1.pdf [file Table_S1.pdf]

**Table S1.** List of primers used for PCR.

| <b>Gene name</b> | <b>Forward primer</b>                    | <b>Reverse primer</b>                  |
|------------------|------------------------------------------|----------------------------------------|
| <i>Ubiquitin</i> | 5'-ATGCAGATC/TTTTGTGAAGAC-3'             | 5'-ACCACCACGG/AAGACGGAG-3'             |
| <i>PT4</i>       | 5'-<br>CATTCTGAGCTGATCGTCGTATGGTG<br>-3' | 5'-<br>GCATTAAGAATTTCCCCAGAGGTC-<br>3' |
| <i>GFP</i>       | 5'-ATCGACTTCAAGGAGGACGG-3'               | 5'-CTTTGCTCAGGGCGGACTGG-3'             |
